# Supplementary material for: Diblock copolymer glyco-nanomicelles constructed by a maltoheptaose-based amphiphile for reduction- and pH-mediated intracellular drug delivery
Source: Royal Society of Chemistry journal article supplement (doi:10.1039/c7py01601h), 2018-01-01
Supplement: c7py01601h1.pdf [file c7py01601h1.pdf]

**Diblock Copolymer Glyco-nanomicelles Constructed by Maltoheptaose-based  
Amphiphile for Reduction- and pH-mediated Intracellular Drug Delivery**

Lulu Cheng,<sup>‡<sup>a</sup></sup> Tingting Luan,<sup>‡<sup>a</sup></sup> Di Liu,<sup>‡<sup>b</sup></sup> Ju Cheng,<sup>b</sup> Hongping Li,<sup>a</sup> Hua Wei,<sup>a</sup> Lifeng Zhang,<sup>a</sup> Jingfeng Lan,<sup>a</sup> Yali Liu,<sup>c</sup> and Guanghui Zhao<sup>a,\*</sup>

<sup>a</sup> State Key Laboratory of Applied Organic Chemistry, Institute of Biochemical Engineering & Environmental Technology, College of Chemistry and Chemical Engineering, Lanzhou University, Lanzhou 730000, People's Republic of China.

<sup>b</sup> School of Basic Medical Sciences, Lanzhou University, Lanzhou 730000, People's Republic of China.

<sup>c</sup> Gansu Provincial Maternity and Child-care Hospital, Lanzhou 730050, People's Republic of China.

<sup>‡</sup> These authors contributed equally to this work and should be considered co-first authors.

\* Corresponding Author, E-mail: zhaogh@lzu.edu.cn

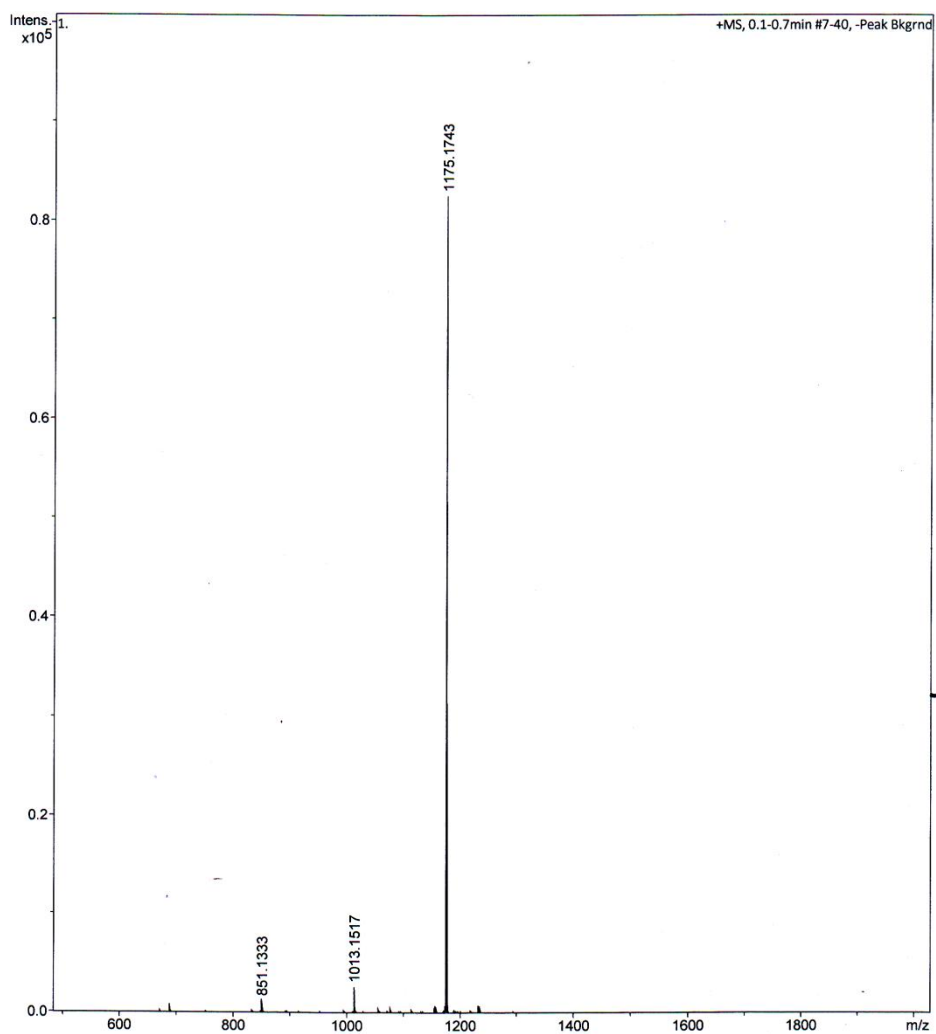

**Figure S1.** HRMS-ESI of MH.

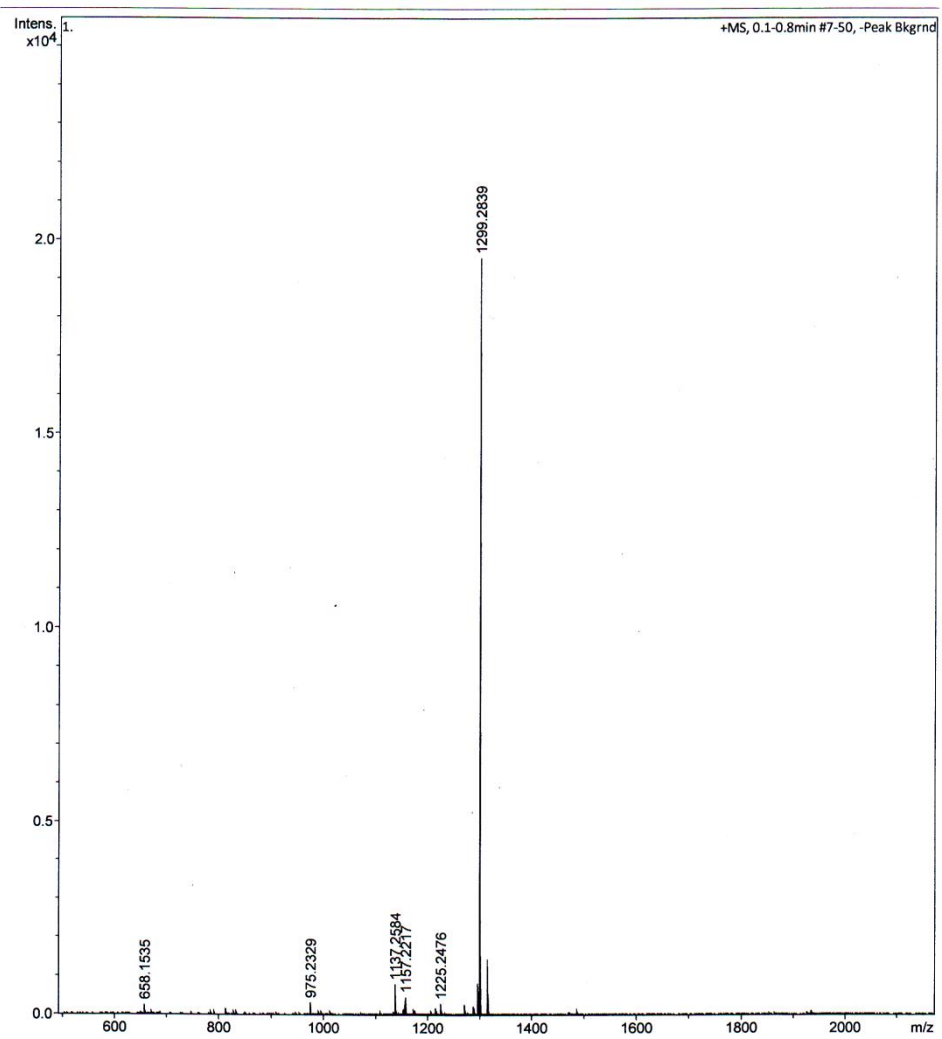

Figure S2. HRMS-ESI of MH-N<sub>3</sub>.

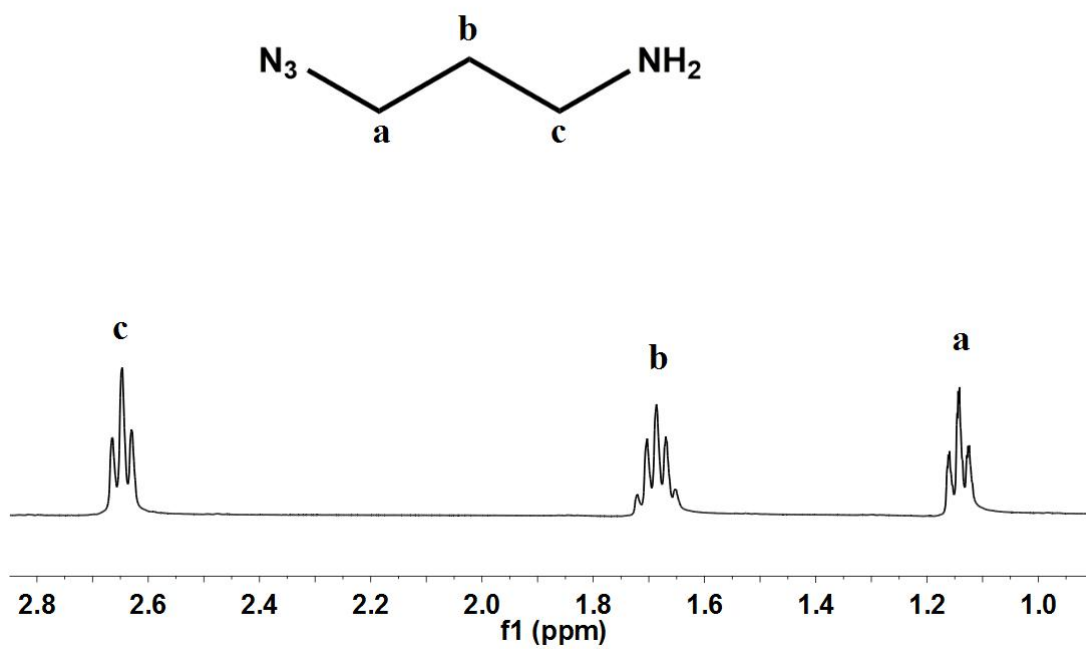

Figure S3. <sup>1</sup>H NMR of 3-azidopropylamine.

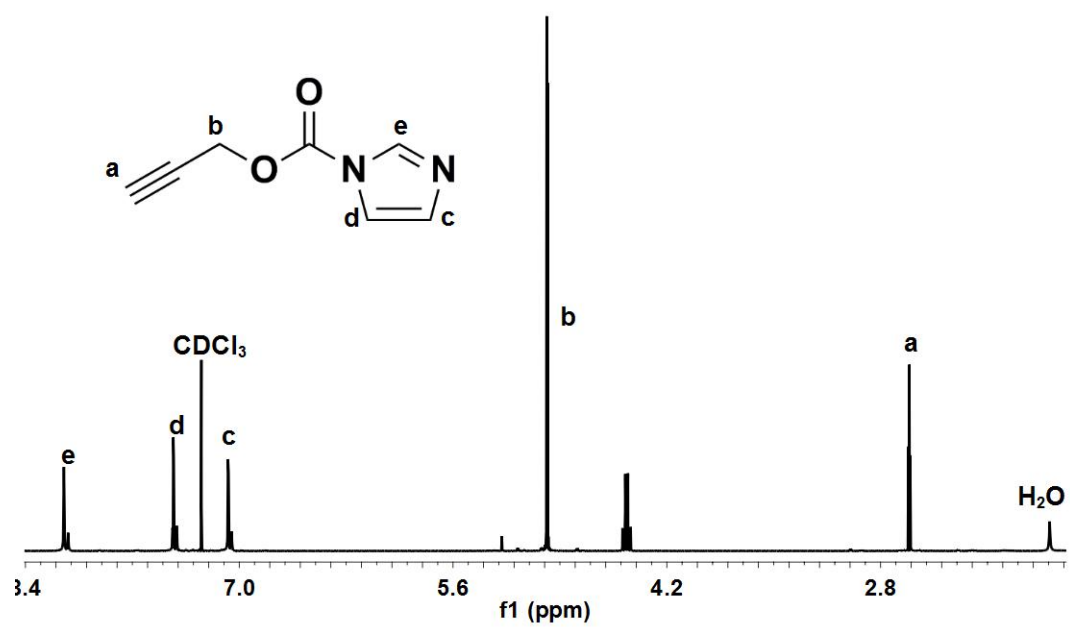

Figure S4. <sup>1</sup>H NMR of propargyl carbonylimidazole.

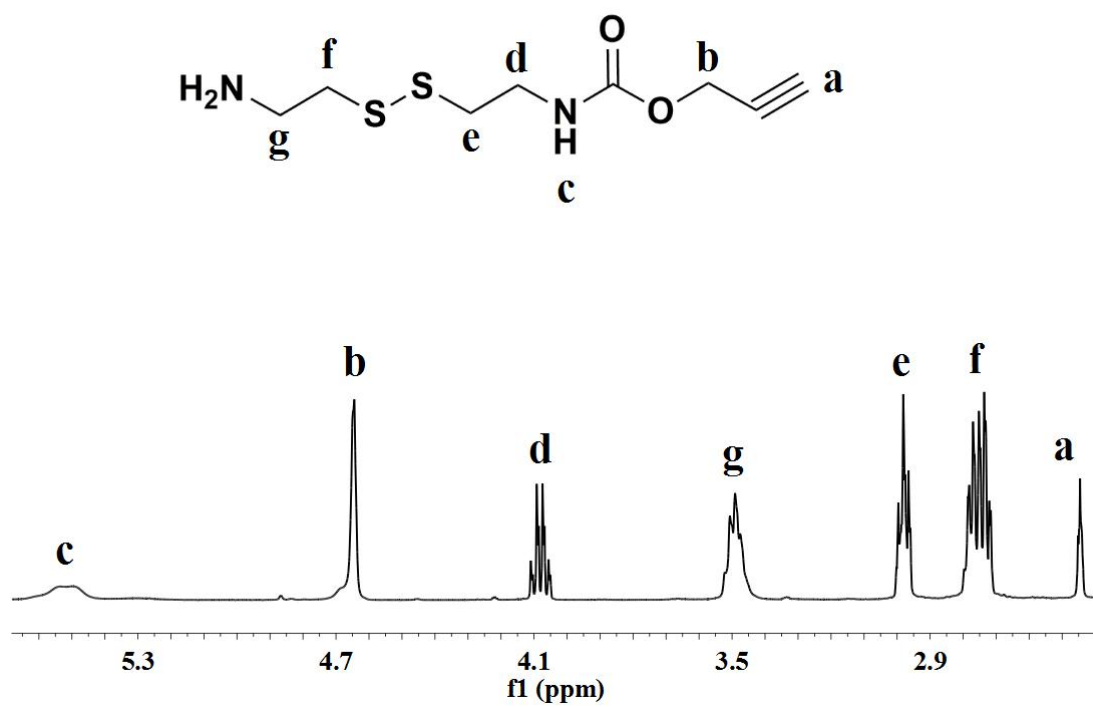

Figure S5. <sup>1</sup>H NMR of propargyl cystamine.

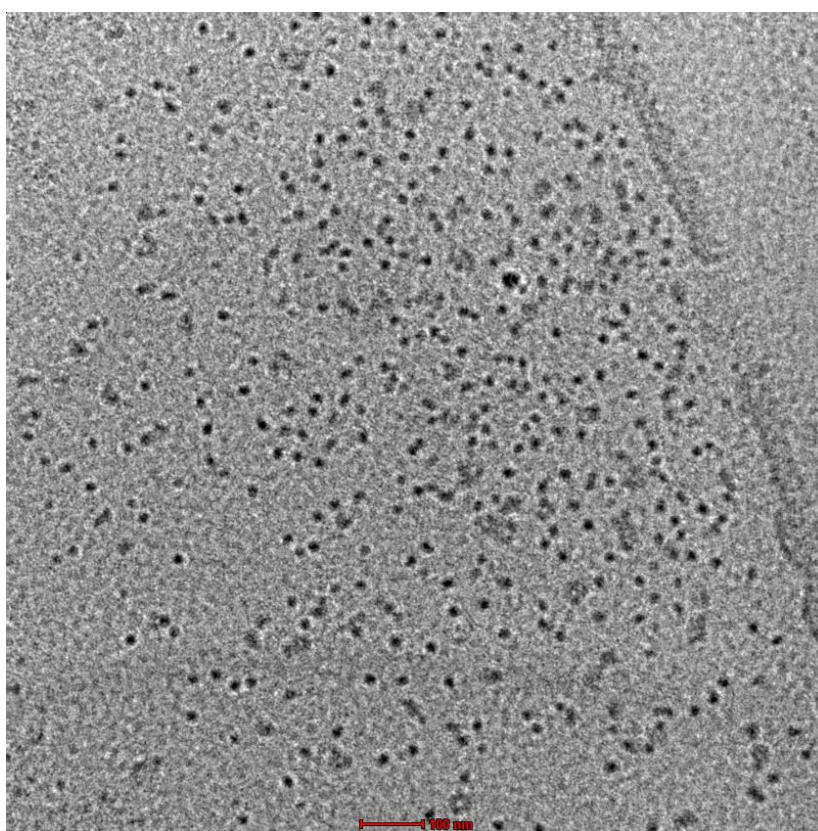

Figure S6. TEM images of DOX-loaded MH-S-S-AcMH micelle.

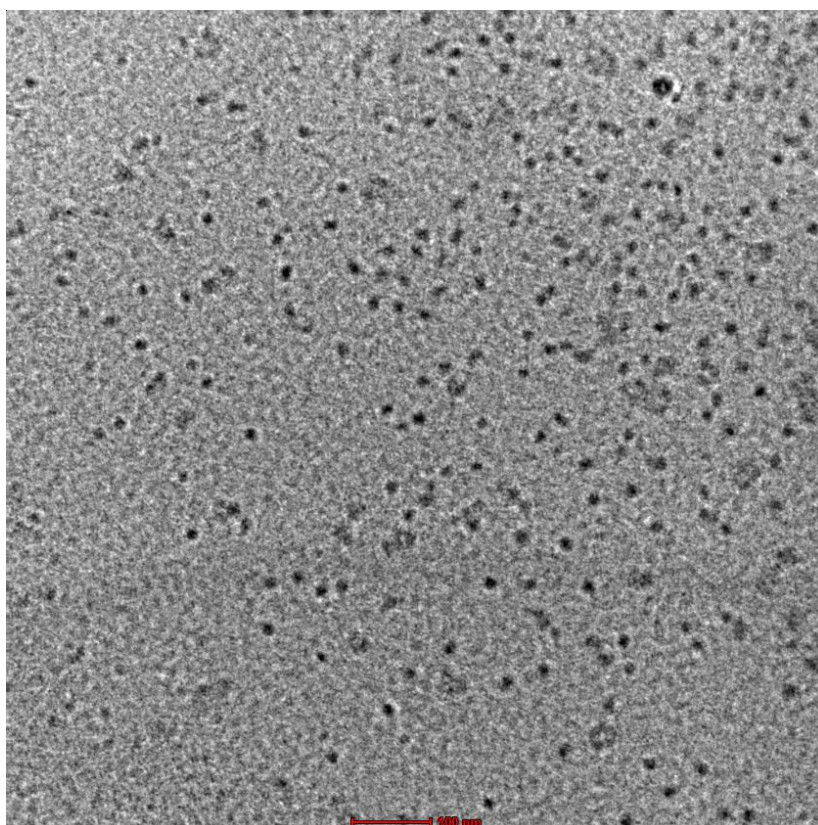

**Figure S7.** TEM images of MH-S-S-AcMH micelle.

|                                   | Size (d.n...         | % Intensity: | St Dev (d.n... |
|-----------------------------------|----------------------|--------------|----------------|
| <b>Z-Average (d.nm):</b> 118.3    | <b>Peak 1:</b> 147.5 | 100.0        | 70.21          |
| <b>Pdl:</b> 0.201                 | <b>Peak 2:</b> 0.000 | 0.0          | 0.000          |
| <b>Intercept:</b> 0.964           | <b>Peak 3:</b> 0.000 | 0.0          | 0.000          |
| <b>Result quality</b> <b>Good</b> |                      |              |                |

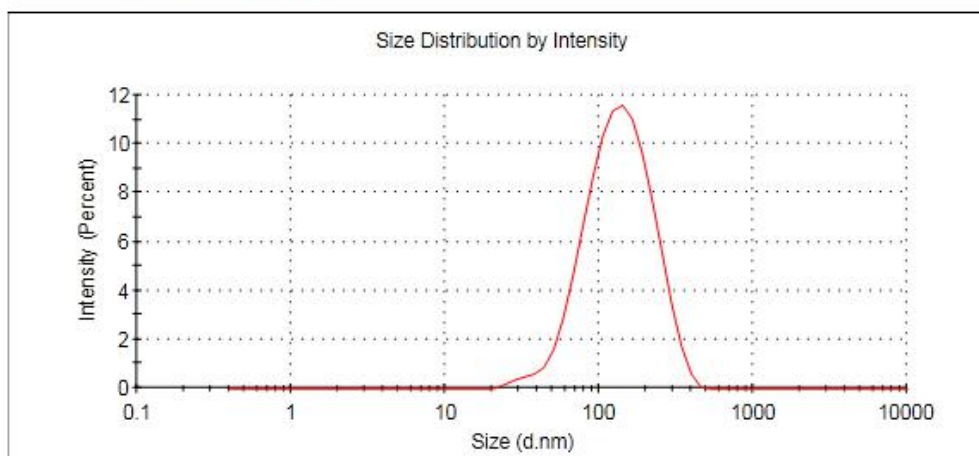

**Figure S8.** Size distributions of DOX-loaded MH-S-S-AcMH micelle.

|                                | Size (d.n...         | % Intensity: | St Dev (d.n... |
|--------------------------------|----------------------|--------------|----------------|
| <b>Z-Average (d.nm):</b> 93.77 | <b>Peak 1:</b> 119.3 | 99.3         | 56.28          |
| <b>Pdl:</b> 0.205              | <b>Peak 2:</b> 21.19 | 0.7          | 4.262          |
| <b>Intercept:</b> 0.906        | <b>Peak 3:</b> 0.000 | 0.0          | 0.000          |

**Result quality** Good

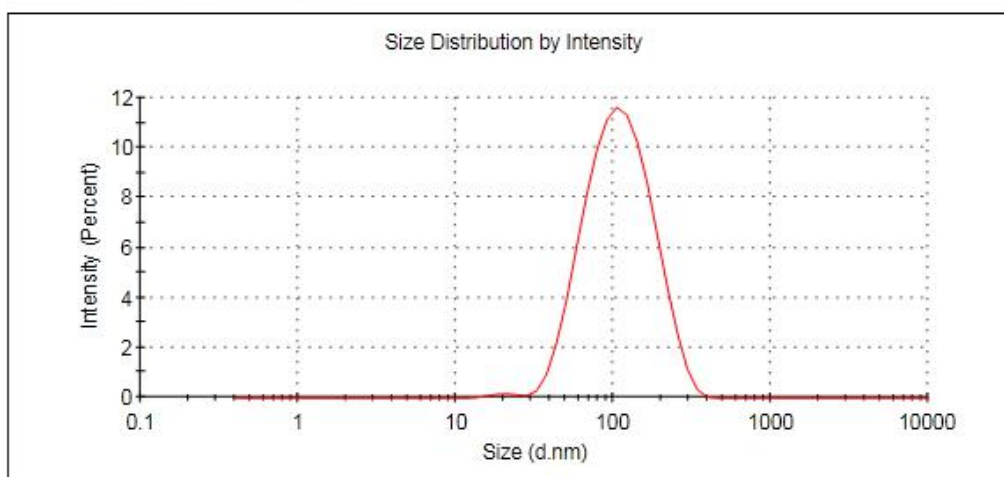

**Figure S9.** Size distributions of MH-S-S-AcMH micelle.



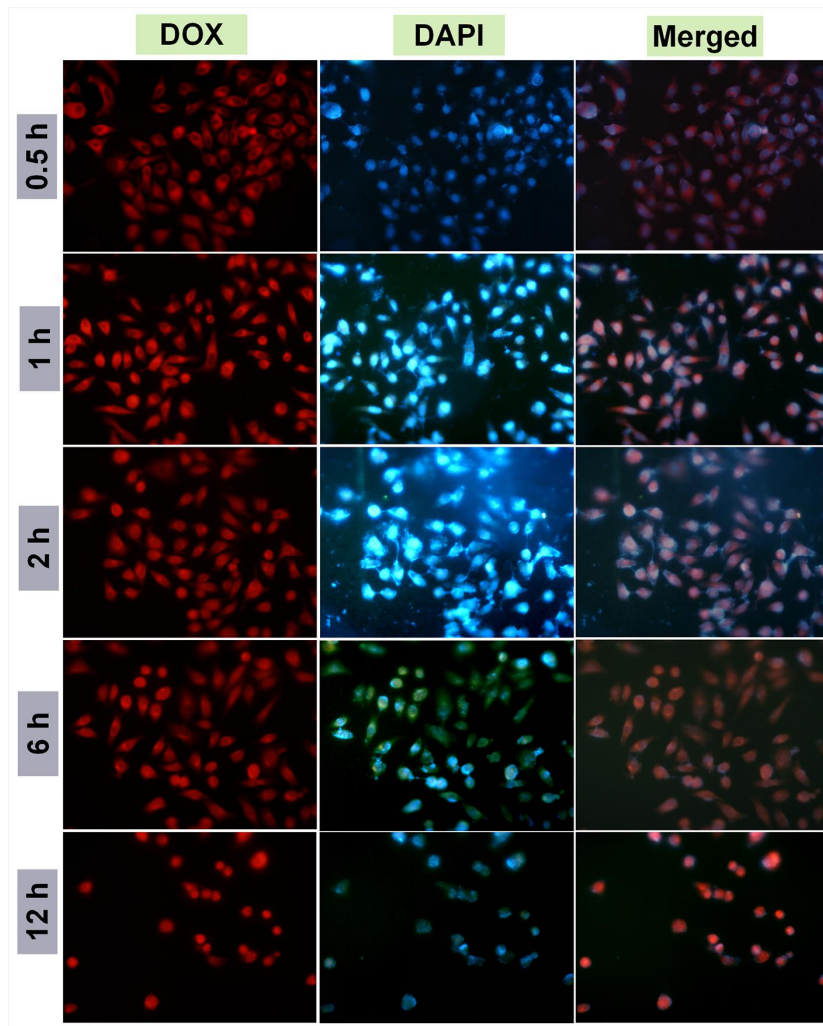

**Figure S10.** Fluorescence microscope images of HeLa cells after different times incubation with free

DOX
